# Supplementary material
Source: Springer Nature journal article supplement (https://www.springermedizin.de/resource/supplementary/12936_2011_1929_MOESM3_ESM.PDF/9542078)
Supplement: MOESM3 [file 9542078]

## Additional file 3: Vihiga District: Recurrent and capital unit costs

**Table 1: Vihiga District: Recurrent Unit Costs**

|                                                                           | Financial cost per unit                                                   |        | Allowances & Extras | Units required |        |               |            |
|---------------------------------------------------------------------------|---------------------------------------------------------------------------|--------|---------------------|----------------|--------|---------------|------------|
|                                                                           |                                                                           |        |                     | Scenario 1-WG  |        | Scenario 2-CG |            |
| COST CATEGORY                                                             | TZS                                                                       | US\$   | US\$                | Y0             | Y1     | Y0            | Y1         |
| <b>INTERNATIONAL COSTS</b>                                                |                                                                           |        |                     |                |        |               |            |
| <b>International Staff Time/Costs</b>                                     |                                                                           |        |                     |                |        |               |            |
| External Technical Adviser                                                |                                                                           | 5,826  | 5,535               | 3              | 5      | 3             | 5          |
| <b>NATIONAL COSTS</b>                                                     |                                                                           |        |                     |                |        |               |            |
| <b>Ministry of Health/NMCP Staff (Central, Provincial &amp; District)</b> |                                                                           |        |                     |                |        |               |            |
| <b>Staff Time/Costs</b>                                                   | <b>Ministry of Health/NMCP Staff (Central, Provincial &amp; District)</b> |        |                     |                |        |               |            |
| Director NMCP                                                             | 790,440                                                                   |        |                     | 0.019          | 1      | 0             | 0.019      |
| NMCP Entomologist                                                         | 308,736                                                                   |        |                     | 0.019          | 1      | 0             | 0.019      |
| Central level Procurement Officer                                         | 106,038                                                                   |        |                     | 0.019          | 1      | 0             | 0.019      |
| Provincial level Malaria Control Officer                                  | 206,796                                                                   |        |                     | 0.019          | 1      | 0             | 0.019      |
| District level Public Health Officer                                      | 206,796                                                                   |        |                     | 0.025          | 1      | 0             | 0.025      |
| District Medical Officer of Health                                        | 752,964                                                                   |        |                     | 0.050          | 2      | 0             | 0.050      |
| <b>PROGRAM LEVEL COSTS</b>                                                |                                                                           |        |                     |                |        |               |            |
| <b>Larviciding program Staff</b>                                          |                                                                           |        |                     |                |        |               |            |
| <b>Staff Time/Costs</b>                                                   | <b>Monthly wage (except LCP)</b>                                          |        |                     |                |        |               |            |
| Program manager                                                           | 25,728                                                                    |        |                     | 6              | 12     | 6             | 12         |
| Divisional Heads                                                          | 17,233                                                                    |        |                     | 36             | 72     | 36            | 72         |
| Field (Location) Supervisor/s                                             | 8,837                                                                     |        |                     | 0              | 156    | 0             | 156        |
| LCP                                                                       | 250                                                                       |        |                     | 0              | 19,800 | 0             | 19,800     |
| Driver                                                                    | 9,873                                                                     |        |                     | 6              | 12     | 6             | 12         |
| Admin assistant                                                           | 9,411                                                                     |        |                     | 0              | 6      | 0             | 6          |
| <b>Larvicide product, application equipment and transport</b>             |                                                                           |        |                     |                |        |               |            |
| Larvicide BTI VectoBac™ WG (Kg)                                           |                                                                           | 25.84  |                     | 0              | 0      | 0             | 7355.33    |
| Larvicide BTI VectoBac™ CG (Kg)                                           |                                                                           | 2.67   |                     | 0              | 0      | 0             | 183,883.33 |
| Carriage Insurance Freight (CIF) on BTI WG from U.S. to Mombassa          |                                                                           | 11,744 |                     | 0              | 1      | 0             | 0          |
| Carriage Insurance Freight (CIF) on BTI CG from U.S. to Mombassa          |                                                                           | 70,782 |                     | 0              | 0      | 0             | 1          |
| Port clearance costs (agent and shipping line) per container              |                                                                           | 643.50 |                     | 0              | 1      | 0             | 1          |
| Taxes and tariffs - Exempted                                              |                                                                           | 0      |                     | 0              | 1      | 0             | 1          |

|                                                                          |           |  |  |    |        |    |       |
|--------------------------------------------------------------------------|-----------|--|--|----|--------|----|-------|
| Transport of Larvicides from Mombassa to Vihiga district HQ              | 185,575   |  |  | 0  | 2      | 0  | 13    |
| Other field equipment (protective clothing, boots, buckets etc)          | 1,683,900 |  |  | 0  | 1      | 0  | 1     |
| <b>Staff Training</b>                                                    |           |  |  |    |        |    |       |
| Salary, Transport & Lunch for LCP during training                        | 882,000   |  |  | 0  | 1      | 0  | 1     |
| Training trip to DSM for Manager and Divisional heads                    | 7,000     |  |  | 0  | 7      | 0  | 7     |
| <b>Meetings and workshops/Community sensitization</b>                    |           |  |  |    |        |    |       |
| Stakeholder meeting                                                      | 5000      |  |  | 0  | 1      | 0  | 1     |
| <b>Operations costs and overheads</b>                                    |           |  |  |    |        |    |       |
| Office space rental                                                      | 6,000     |  |  | 6  | 12     | 6  | 12    |
| Storage space rental district level (containers)                         | 120,000   |  |  | 0  | 1      | 0  | 4     |
| Utilities & Maintenance District Office (Electricity, Water)             | 1,500     |  |  | 6  | 12     | 6  | 12    |
| Other overheads district office (e.g. Insurance and office furniture)    | 1,500     |  |  | 6  | 12     | 6  | 12    |
| Storage and office space at divisional level                             | 2,000     |  |  | 0  | 30     | 0  | 30    |
| Utilities & Maintenance divisional offices (Electricity, Water)          | 500       |  |  | 0  | 5      | 0  | 5     |
| Other overheads divisional offices (e.g. Insurance and office furniture) | 125       |  |  | 0  | 5      | 0  | 5     |
| Truck & driver daily rental to move product from district to division    | 10,000    |  |  | 0  | 4      | 0  | 8     |
| Transport of product to field (LCP transport allowance)                  | 250       |  |  | 0  | 19,800 | 0  | 19800 |
| Mobile phone credits Manager/Div Head/Driver per month (8 people)        | 1,200     |  |  | 42 | 96     | 42 | 96    |
| Mobile phone credits for Field supervisors + admin (21)                  | 500       |  |  | 0  | 84     | 0  | 84    |
| Internet connectivity monthly flat rate                                  | 3,000     |  |  | 6  | 12     | 6  | 12    |
| Stationary, printing and photocopying                                    | 3,631     |  |  | 6  | 12     | 6  | 12    |
| <b>Transport</b>                                                         |           |  |  |    |        |    |       |

|                                                               |         |  |  |        |         |       |        |
|---------------------------------------------------------------|---------|--|--|--------|---------|-------|--------|
| Vehicle Fuel costs (KM)<br>1liters of diesel/10km, 1L = 63KES | 6.3     |  |  | 13,000 | 26,000  | 13000 | 26000  |
| Insurance                                                     | 162,000 |  |  | 0.5    | 1       | 0.5   | 1      |
| Vehicle Service                                               | 12000   |  |  | 2.60   | 5       | 2.60  | 5.20   |
| Tires                                                         | 60000   |  |  | 0.325  | 1       | 0.325 | 0.65   |
| Shock absorbers & other repairs                               | 15000   |  |  | 0.5    | 1       | 0.5   | 1      |
| Motorbike Fuel costs (KM)<br>1L= 76KES; 1L = 40KM             | 1.90    |  |  | 78,000 | 156,000 | 78000 | 156000 |
| Motorbike Insurance                                           | 6,000   |  |  | 3      | 6       | 3     | 6      |
| Motorbike Maintenance/bike/month                              | 2,000   |  |  | 36     | 72      | 36    | 72     |
| Bicycles                                                      | 4,000   |  |  | 0      | 26      | 0     | 26     |
| <b>Adult Mosquito Monitoring</b>                              |         |  |  |        |         |       |        |
| Traps (pots)                                                  | 80      |  |  | 351    | 702     | 351   | 702    |
| Supplies (ethanol, vials, Petri dishes, dissecting kits)      | 5,000   |  |  | 6      | 12      | 6     | 12     |

**Table 2: Vihiga District: Capital Unit Costs**

|                                                                 | Purchase price |       | Units required |               | Useful life (years) |
|-----------------------------------------------------------------|----------------|-------|----------------|---------------|---------------------|
|                                                                 | TZS            | US\$  | Scenario 1 WG  | Scenario 2 CG |                     |
| <b>CAPITAL COSTS (Useful life &gt; 1 year)</b>                  |                |       |                |               |                     |
| <b>Vehicles</b>                                                 |                |       |                |               |                     |
| Project vehicle (Toyota Hilux Diesel pickup)                    | 2,700,000      |       | 1              | 1             | 5                   |
| Motorcycles                                                     | 100,000        |       | 6              | 6             | 3                   |
| <b>Spray pumps</b>                                              |                |       |                |               |                     |
| Hudson spray pumps                                              | 18,155         |       | 400            | 0             | 5                   |
| <b>Computers, Mobile phones, GPS units and office equipment</b> |                |       |                |               |                     |
| Mobile phones                                                   |                | 80    | 29             | 29            | 3                   |
| GPS units                                                       |                | 120   | 6              | 6             | 3                   |
| Computer software and licenses                                  |                | 500   | 1              | 1             | 3                   |
| Desk Top computer                                               |                | 1,100 | 1              | 1             | 3                   |
| Internet connectivity                                           |                | 300   | 1              | 1             | 3                   |
| Laptop                                                          |                | 1,300 | 1              | 1             | 3                   |
| Printer                                                         |                | 500   | 1              | 1             | 2                   |
| <b>Adult Mosquito Monitoring</b>                                |                |       |                |               |                     |
| Microscope, light source                                        |                | 2,000 | 1              | 1             | 5                   |
